# Supplementary material for: The effect of cochlear implant surgery on vestibular function in adults: A meta-analysis study
Source: Front Neurol. 2022 Aug 10;13:947589. doi: 10.3389/fneur.2022.947589 (PMC9402268; doi:10.3389/fneur.2022.947589)
Supplement: Supplementary file 2 [file Table_1.XLSX]

## Sheet: VEMP
VEMP
Author	ev_before	n_before	ev_after	n_after	Inrr	ep
Barbara 2019	5	22	0	6	1.15688	1.40971
Colin 2018	7	22	3	22	0.845868	0.621273
Coordes 2012	17	17	14	17	0.19062	0.106882
Ernst 2006	12	18	4	18	1.09861	0.471663
Guan 2021	10	15	0	15	3.04452	1.40309
Imai 2019	1	8	1	8	0	1.33987
Louza 2015	29	41	11	41	0.970779	0.277464
Maheu 2017	3	4	1	4	1.09861	0.913453
Meli 2016	17	25	4	25	1.44692	0.478915
Melvin 2009	12	19	11	16	-0.0833816	0.243408
Miwa 2018	4	9	9	9	-0.755023	0.345547
Nordfalk 2014	9	12	5	12	0.587787	0.381348
Nordfalk 2014	21	33	10	33	0.741937	0.294278
Nordfalk 2015	25	33	13	33	0.652325	0.236682
Rasmussen 2021	10	43	5	43	0.693147	0.502171
Tsukada 2021	31	56	27	56	0.139762	0.183122
West 2021	10	36	5	36	0.693147	0.493997

## Sheet: Caloric test
caloric test
Author	ev_before	n_before	ev_after	n_after	Inrr	ep
Black 1987	2	5	2	5	0	0.773329
Brey 1995	8	17	5	17	0.470004	0.45384
Enticott 2006	65	86	65	86	0	0.0888537
Guan 2021	11	15	3	15	1.30019	0.540079
Ito 1998	18	55	11	55	0.494696	0.333352
Kiyomizu 2000	13	23	7	23	0.620576	0.363948
Kluenter 2009	18	24	21	24	-0.150823	0.141072
Louza 2015	30	41	8	41	1.32176	0.330857
Melvin 2009	14	20	15	16	-0.287682	0.157561
Miwa 2018	4	9	5	9	-0.223144	0.480646
Parietti Winkler 2015	5	10	5	10	0	0.444635
Piker 2020	9	10	7	10	0.254642	0.231247
Rasmussen 2021	36	43	26	43	0.322083	0.140318
Tsukada 2021	38	56	31	49	0.0676586	0.143209
Vibert 2001	6	11	4	8	0.0861777	0.45038
West 2021	26	34	15	34	0.548121	0.214222

## Sheet: vHIT
vHIT
Author	ev_before	n_before	ev_after	n_after	Inrr	ep
Batuecas Caletrio 2015	30	30	20	30	0.398776	0.127215
Bittar 2018	19	31	4	6	-0.0833816	0.321804
Maheu 2017	4	4	4	4	0	0.236166
Piker 2020	9	10	9	10	0	0.148049
Rasmussen 2021	40	43	39	43	0.0295588	0.0647399
West 2021	34	37	30	37	0.122218	0.0942245

## Sheet: HIT
HIT
Author	ev_before	n_before	ev_after	n_after	Inrr	ep
Colin et al. 2018	18	22	9	22	0.693147	0.274377
Jutila et al. 2012	19	44	15	44	0.239017	0.273269
Meli et al. 2016	17	25	23	25	-0.301105	0.149946
Melvin et al. 2009	14	14	10	10	0	0.083682
Migliaccio et al. 2005	14	16	10	11	-0.040822	0.133737

## Sheet: VNG
VNG
Author	ev_before	n_before	ev_after	n_after	Inrr	ep
Batuecas Caletrio 2015	30	30	27	30	0.10436	0.0594882
Colin 2018	9	22	5	22	0.587787	0.468627
Filipo 2006	6	14	5	14	0.182322	0.475404
Nordfalk 2014	8	13	4	8	0.207014	0.41802
Nordfalk 2014	17	32	14	17	-0.430783	0.19902
Nordfalk 2015	20	30	13	30	0.431782	0.24581
